# Supplementary material for: The application of antibiotics in broiler production and the resulting antibiotic resistance in Escherichia coli: A global overview
Source: PubMed Central journal article supplement — Poult Sci. 2018 Dec 13;98(4):1791–804. doi: 10.3382/ps/pey539 (PMC6414035; doi:10.3382/ps/pey539), 2018-12-13
Supplement: pey539_supplemental_file.pdf [file pey539_supplemental_file.pdf]

1 **Supplementary material to the manuscript: “The application of antibiotics in broiler production and**  
2 **the resulting antibiotic resistance in *Escherichia coli*: A global overview”**

3 **Antibiotic resistance in *E. coli* from poultry in Poland, United Kingdom, Germany, France and Spain**

4 Nataliya Roth <sup>\*,1</sup>, Annemarie Kaesbohrer<sup>‡</sup>, Sigrid Mayrhofer<sup>\*</sup>, Ulrike Zitz<sup>\*</sup>, Charles Hofacre<sup>§</sup>,  
5 Konrad J. Domig<sup>\*</sup>

6 <sup>\*</sup>BOKU - University of Natural Resources and Life Sciences Vienna, Department of Food  
7 Science and Technology, Institute of Food Science, Austria

8 <sup>†</sup>BIOMIN Holding GmbH, Austria

9 <sup>‡</sup>University of Veterinary Medicine Vienna, Department for Farm Animals and Veterinary  
10 Public Health, Institute of Veterinary Public Health, Austria

11 <sup>§</sup>Poultry Diagnostics and Research Center, University of Georgia, United States of America

12 <sup>1</sup>Corresponding author (nataliya.roth@boku.ac.at) Muthgasse 18; 1190 Vienna; Austria

13 tel ±43 1 47654-75000

14 **POLAND**

15 Poland began to implement a national monitoring programme for antibiotic resistance  
16 in commensal *E. coli* isolates from poultry in 2009 (Wasył, et al., 2012). Figure 1 shows  
17 resistance to several antibiotics in the *E. coli* isolates from broilers at the slaughterhouse level  
18 from 2009 to 2014 (European Food Safety Authority and European Centre for Disease  
19 Prevention and Control, 2015, 2016; Wasył, et al., 2013). The data in Figure 1 shows high  
20 resistance rates (from 70 to 90%) to ciprofloxacin, nalidixic acid and ampicillin, and 50 to 70%  
21 resistance against tetracycline, sulfamethoxazole and streptomycin. The reason for the 0%  
22 resistance rate to sulfamethoxazole in 2013 is not clear and may be explained with changes in  
23 the resistance detection values. Data from Wasył, et al. (2013) correspond to data from the EU

24 summary report on antibiotic resistance (European Food Safety Authority and European Centre  
25 for Disease Prevention and Control, 2014). Wasyl, et al. (2013) showed that the average  
26 resistance of multiresistant *E. coli* isolates from broilers in the period from 2009 to 2012 was  
27 80.6%. The same study detected increasing trends of ampicillin and cefotaxime resistance in  
28 the observed *E. coli* isolates.

## 29 **UNITED KINGDOM**

30 AR data for *E. coli* isolated from broilers in the United Kingdom are available from two  
31 distinct AR-monitoring programmes: the EU monitoring and the clinical monitoring  
32 programmes (Veterinary Medicines Directorate, 2015). The EU monitoring programme  
33 isolated *E. coli* from healthy broilers across the United Kingdom. The clinical monitoring  
34 programme is passive monitoring. Its aim is the evaluation of AR to antibiotics of veterinary  
35 relevance in bacteria that are isolated from the clinical samples of diseased animals. Figure 2  
36 presents the resistance rates of these tested *E. coli* isolates (Veterinary Medicines Directorate,  
37 2015). Both monitoring programmes show high AR rates of *E. coli* to ampicillin and  
38 tetracycline. Bywater, et al. (2004) and Randall, et al. (2011) confirm the higher resistance rates  
39 to sulfonamides, ampicillin, and tetracycline in *E. coli* in UK. An analysis of the  
40 fluoroquinolone resistance in *E. coli* from faeces samples of 68 broiler farms in the UK detected  
41 resistance to ciprofloxacin at 50% of these farms (Taylor, et al., 2008).

## 42 **GERMANY**

43 The Federal Office of Consumer Protection and Food Safety reports on antibiotic  
44 resistance monitoring in Germany. Similar to the monitoring programmes of the UK, two  
45 different surveillance systems exist in Germany. The first one monitors healthy animals and the  
46 products thereof. The second system is the GERM Vet Report that contains data about the  
47 resistance of animal pathogens. Figure 3 shows results for *E. coli* isolates from intestinal

48 samples of healthy broilers in Germany (European Food Safety Authority and European Centre  
49 for Disease Prevention and Control, 2011, 2016; German Federal Office of Consumer  
50 Protection and Food Safety, 2012a, 2013, 2015a, 2016a, Kaesbohrer, et al., 2012).

51 Germany monitors the AR in *E. coli* isolates from intestinal samples of broilers, chicken  
52 meat and diseased animals. As not all antibiotics are monitored to evaluate their resistance rates  
53 in diseased animals, it is only possible to compare the resistance rates of some antibiotics. All  
54 three systems show higher resistance rates to ampicillin and sulfamethoxazole than to other  
55 antibiotics (German Federal Office of Consumer Protection and Food Safety, 2012b, 2012c,  
56 2014, 2015b, 2016b). The AR rates to ampicillin in *E. coli* from intestinal samples are  
57 approximately 60%, from meat samples approximately 68% and from diseased animals  
58 approximately 42%. The resistance rate to sulfamethoxazole is approximately 50% in *E. coli*  
59 from intestinal samples, 65% from meat samples and approximately 55% from diseased  
60 animals. For *E. coli* that were isolated from intestinal samples and retail meat, the resistance  
61 rates to ciprofloxacin, nalidixic acid, streptomycin, tetracycline and trimethoprim are between  
62 40 and 60%. Except for trimethoprim, these antibiotics are not allowed for use in broilers in  
63 Germany. However, other representatives of the fluoroquinolones, aminoglycosides and  
64 tetracyclines may be used. The resistance rates of *E. coli* from diseased chickens to tetracycline  
65 and ciprofloxacin are approximately 30 and 7%, respectively. It seems that the resistance to  
66 ciprofloxacin is lower in diseased animals than in healthy animals, and resistance to  
67 cephalosporins is higher in diseased animals than in healthy animals. However, the resistance  
68 rates must be measured over longer periods of time to confirm these differences.

69 The plasmid-mediated colistin resistance gene MCR-1 that was detected by Lui et al.  
70 (2016) in China was also found in *E. coli* from broilers and chicken meat in Germany. The  
71 national monitoring programme of zoonotic agents for the years 2010-2014 demonstrates that  
72 7% of the 1474 *E. coli* isolates tested from broilers were colistin-resistant and 93% of these  
73 colistin-resistant isolates harboured the MCR-1 gene (Irrgang, et al., 2016). The same study

74 shows that 6% of the 580 *E. coli* isolates tested from chicken meat for the national monitoring  
75 of zoonotic agents in the years 2011-2014 showed colistin resistance.

## 76 **FRANCE**

77 France participates in the EU monitoring of AR in animals. Figure 4 shows the  
78 resistance rates of *E. coli* from broilers since 2005 (European Food Safety Authority and  
79 European Centre for Disease Prevention and Control, 2011; European Food Safety Authority  
80 and European Centre for Disease Prevention and Control, 2012; European Food Safety  
81 Authority and European Centre for Disease Prevention and Control, 2013; European Food  
82 Safety Authority and European Centre for Disease Prevention and Control, 2014; European  
83 Food Safety Authority and European Centre for Disease Prevention and Control, 2015;  
84 European Food Safety Authority and European Centre for Disease Prevention and Control,  
85 2016).

86 The French Agency for Veterinary Medicinal Products (ANSES-ANMV) reports on  
87 national antibiotic resistance monitoring in France. The ANSES-ANMV provides reports on  
88 the French surveillance network for antibiotic resistance in pathogenic bacteria of animal origin  
89 (RESAPATH). The RESAPATH presents the results of the monitoring of AR in *E. coli* from  
90 diseased hens and broilers that are treated by veterinarians as part of their regular clinical  
91 services.

92 Tetracycline is approved for use in poultry in France. Due to the availability of the  
93 quantitative use of antibiotics in poultry, a comparison between antibiotic use and resistance is  
94 possible. According to this figure, more tetracyclines and polymyxins than other antibiotics are  
95 used in poultry. Consequently, the resistance rates to tetracyclines are also higher than those of  
96 other antibiotics. They are approximately 70% in all systems. However, there was a decrease  
97 in the use of tetracycline between 2007 and 2013, which was accompanied by a decrease of  
98 tetracycline-resistance rates in *E. coli* between 2011 and 2014. Thus, less use of an antibiotic

99 may result in less resistance to that antibiotic. It may be that the lower antibiotic use in the  
100 country leads to lower resistance rates. This hypothesis needs to be confirmed in other countries,  
101 and the availability of quantitative data of antibiotic use allows this comparison.

102 Penicillins are quantitatively the third most frequently applied antibiotic class, after  
103 tetracyclines and polymyxins. The detected resistance rates for penicillins (50%) are lower than  
104 those of tetracyclines in France. There was an increase in penicillin use and resistance rates in  
105 *E. coli* between 2006 and 2014.

## 106 SPAIN

107 The Spanish antibiotic resistance surveillance network “Red de Vigilancia de  
108 Resistencias Antibioticas en Bacterias de Origen Veterinario” (VAV) was formed in 1996  
109 (Moreno, 2000). The VAV reports present data on AR in *E. coli* that are taken from healthy  
110 broilers during the period from 1999 to 2005 (Ministry of Agriculture Fisheries and Food in  
111 Spain 2005, 2006). Additionally, AR data are available from the EU Summary reports. Figure  
112 5 presents all available data.

113 The fluoroquinolones enrofloxacin and flumequine are allowed for use in poultry in  
114 Spain. The monitoring data show that AR to ciprofloxacin in *E. coli* increased from 17% in  
115 2001 to 85% in 2014, and that of nalidixic acid increased from 60% in 2001 to 83% in 2014.  
116 Whether the increased use of the fluoroquinolones may have influenced this increase cannot be  
117 evaluated without the presence of quantitative AU data. Tetracycline and the penicillins are  
118 registered for use in Spain. The AR resistance rates to tetracycline and ampicillin are  
119 approximately 70%. A decrease of resistance to tetracycline was observed between 1999 and  
120 2014. Neomycin and sulfamethoxazole are also approved for use in poultry. The resistance to  
121 neomycin is approximately 20%. However, the resistance rates to streptomycin, another  
122 aminoglycoside, and sulfamethoxazole are approximately 55%.

123 There is also a scientific study that detected resistance in *E. coli* to nalidixic acid,  
124 tetracycline, trimethoprim, gentamycin and ampicillin and showed 88, 75, 65, 40 and 38%  
125 resistance, respectively (Saenz, et al., 2001).

## 126 REFERENCES

127 Bywater, R., H. Deluyker, E. Deroover, A. de Jong, H. Marion, M. McConville, T. Rowan, T.  
128 Shryock, D. Shuster, V. Thomas, M. Valle, and J. Walters. 2004. A European survey of  
129 antimicrobial susceptibility among zoonotic and commensal bacteria isolated from food-  
130 producing animals. *J. Antimicrob. Chemother.* 54:744-754.

131  
132 European Food Safety Authority, and European Centre for Disease Prevention and Control.  
133 2011. European Union summary report on antimicrobial resistance in zoonotic and indicator  
134 bacteria from animals and food in the European Union in 2009. *EFSA Journal* 2011 9(7):321.

135  
136 European Food Safety Authority, and European Centre for Disease Prevention and Control.  
137 2012. The European Union Summary Report on antimicrobial resistance in zoonotic and  
138 indicator bacteria from humans, animals and food in 2010. *EFSA Journal* 2012. 10(3):2598

139  
140 European Food Safety Authority, and European Centre for Disease Prevention and Control.  
141 2013. The European Union Summary Report on antimicrobial resistance in zoonotic and  
142 indicator bacteria from humans, animals and food in 2011. *EFSA Journal* 2013 11(5):359.

143  
144 European Food Safety Authority, and European Centre for Disease Prevention and Control.  
145 2014. The European Union summary report on antimicrobial resistance in zoonotic and  
146 indicator bacteria from humans, animals and food in 2012. *EFSA Journal* 2014 12(3):336.

147

148 European Food Safety Authority, and European Centre for Disease Prevention and Control.  
149 2015. The European Union summary report on antimicrobial resistance in zoonotic and  
150 indicator bacteria from humans, animals and food in 2013. EFSA Journal 2015 13(2):178.  
151

152 European Food Safety Authority, and European Centre for Disease Prevention and Control.  
153 2016. The European Union Summary Report on antimicrobial resistance in zoonotic and  
154 indicator bacteria from humans, animals and food in 2014. EFSA Journal 2016 14(2):207.  
155

156 German Federal Office of Consumer Protection and Food Safety. 2012a. Berichte zur  
157 Lebensmittelsicherheit Zoonosen Monitoring 2010.  
158

159 German Federal Office of Consumer Protection and Food Safety. 2012b. Berichte zur  
160 Resistenzmonitoringstudie 2008. Resistenzsituation bei klinisch wichtigen tierpathogenen  
161 Bakterien.  
162

163 German Federal Office of Consumer Protection and Food Safety. 2012c. Berichte zur  
164 Resistenzmonitoringstudie 2009. Resistenzsituation bei klinisch wichtigen tierpathogenen  
165 Bakterien.  
166

167 German Federal Office of Consumer Protection and Food Safety. 2013. Berichte zur  
168 Lebensmittelsicherheit Zoonosen Monitoring 2011.  
169

170 German Federal Office of Consumer Protection and Food Safety. 2014. BVL-Report 8.6.  
171 Berichte zur Resistenzmonitoringstudie Resistenzsituation bei klinisch wichtigen  
172 tierpathogenen Bakterien 2010/2011.  
173

174 German Federal Office of Consumer Protection and Food Safety. 2015a. BVL-Report 9.4  
175 Berichte zur Lebensmittelsicherheit Zoonosen Monitoring 2013.  
176  
177 German Federal Office of Consumer Protection and Food Safety. 2015b. BVL-Report · 9.5.  
178 Berichte zur Resistenzmonitoringstudie. Resistenzsituation bei klinisch wichtigen  
179 tierpathogenen Bakterien 2011/2012.  
180 German Federal Office of Consumer Protection and Food Safety. 2016a. BVL-Report 10.4  
181 Berichte zur Lebensmittelsicherheit Zoonosen Monitoring 2014.  
182  
183 German Federal Office of Consumer Protection and Food Safety. 2016b. BVL-Report 10.5.  
184 Berichte zur Resistenzmonitoringstudie. Resistenzsituation bei klinisch wichtigen  
185 tierpathogenen Bakterien 2012/2013.  
186  
187 Irrgang, A., N. Roschanski, B. A. Tenhagen, M. Grobbel, T. Skladnikiewicz-Ziemer, K.  
188 Thomas, U. Roesler, and A. Kasbohrer. 2016. Prevalence of mcr-1 in E. coli from Livestock  
189 and Food in Germany, 2010-2015. PloS one 11:e0159863.  
190  
191 Kaesbohrer, A., A. Schroeter, B. A. Tenhagen, K. Alt, B. Guerra, and B. Appel. 2012.  
192 Emerging antimicrobial resistance in commensal Escherichia coli with public health  
193 relevance. Zoonoses Public Health 59 Suppl 2:158-165.  
194  
195 Ministry of Agriculture Fisheries and Food in Spain. 2005. Veterinary Monitoring of  
196 Antimicrobial Resistance in Spain VAV 2004.  
197  
198 Ministry of Agriculture Fisheries and Food in Spain. 2006. Veterinary Monitoring of  
199 Antimicrobial Resistance in Spain 2005.



200

201 Moreno, M. 2000. Antibiotic resistance monitoring: the Spanish programme. *Int. J.*

202 *Antimicrob. Agents.* 14:285-290.

203

204 Randall, L. P., C. Clouting, R. A. Horton, N. G. Coldham, G. Wu, F. A. Clifton-Hadley, R. H.

205 Davies, and C. J. Teale. 2011. Prevalence of *Escherichia coli* carrying extended-spectrum

206 beta-lactamases (CTX-M and TEM-52) from broiler chickens and turkeys in Great Britain

207 between 2006 and 2009. *J. Antimicrob. Chemother.* 66:86-95.

208

209 Saenz, Y., M. Zarazaga, L. Brinas, M. Lantero, F. Ruiz-Larrea, and C. Torres. 2001.

210 Antibiotic resistance in *Escherichia coli* isolates obtained from animals, foods and humans in

211 Spain. *Int. J. Antimicrob. Agents.* 18:353-358.

212

213 Taylor, N. M., R. H. Davies, A. Ridley, C. Clouting, A. D. Wales, and F. A. Clifton-Hadley.

214 2008. A survey of fluoroquinolone resistance in *Escherichia coli* and thermophilic

215 *Campylobacter* spp. on poultry and pig farms in Great Britain. *J. Appl. Microbiol.* 105:1421-

216 1431.

217

218 Veterinary Medicines Directorate. 2015. UK veterinary antibiotic resistance and sales

219 surveillance report 2014.

220

221 Wasyl, D., H. Hasman, L. M. Cavaco, and F. M. Aarestrup. 2012. Prevalence and

222 characterization of cephalosporin resistance in nonpathogenic *Escherichia coli* from food-

223 producing animals slaughtered in Poland. *Microb. Drug Resist.* 18:79-82.

224

225 Wasyl, D., A. Hoszowski, M. Zajac, and K. Szulowski. 2013. Antimicrobial resistance in  
 226 commensal *Escherichia coli* isolated from animals at slaughter. *Front. Microbiol.* 4:221.

227 **FIGURE LEGENDS**

228

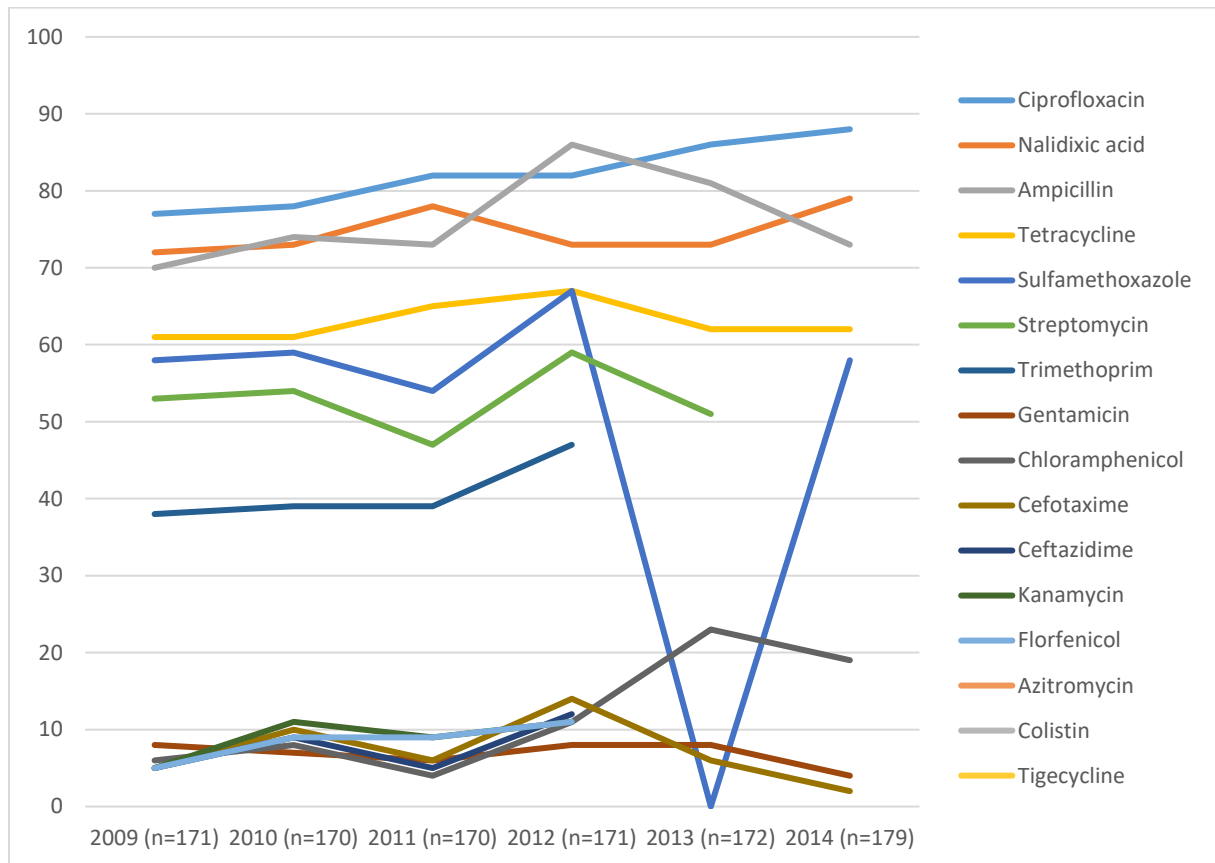

229

230 Figure 1. Percentages of antibiotic resistance in *E. coli* isolates from broilers at slaughterhouse  
 231 level in the period from 2009 to 2014 in Poland, based on European Food Safety Authority and  
 232 European Centre for Disease Prevention and Control 2015, 2016; Wasyl, et al., 2013).

233

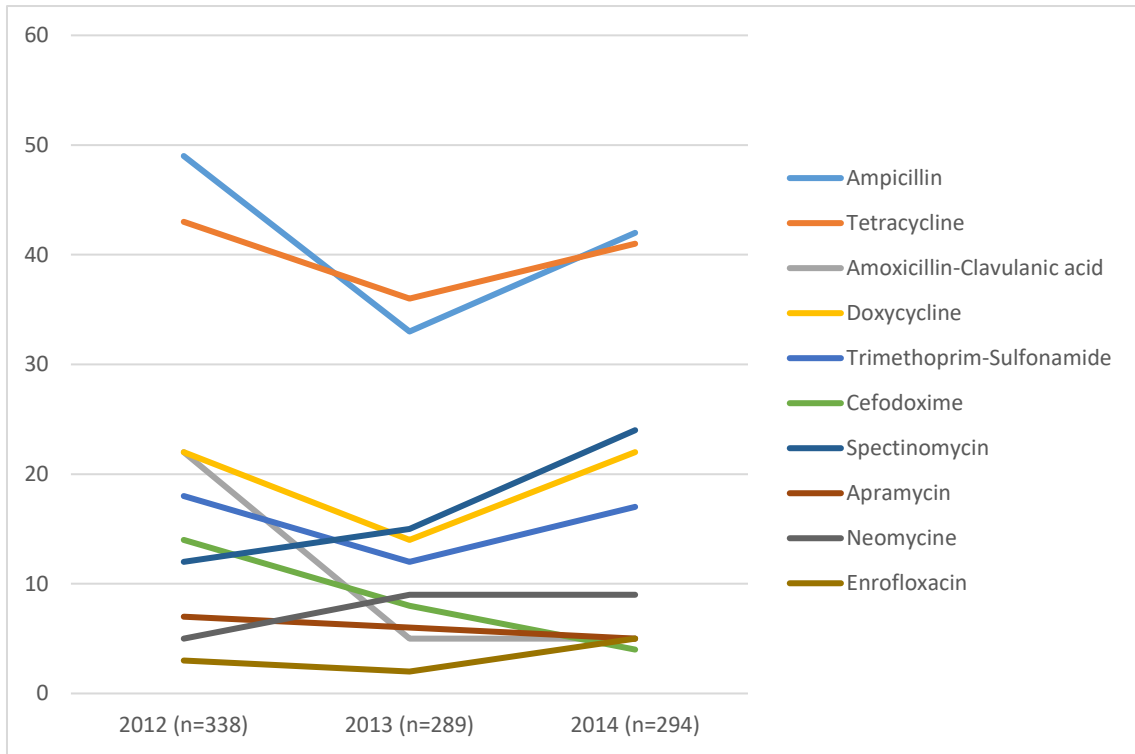

234

235

236 Figure 2. Percentages of antibiotic resistance in *E. coli* isolates from diseased broilers in the

237 period from 2012 to 2014 in UK, based on Veterinary Medicines Directorate (2015).

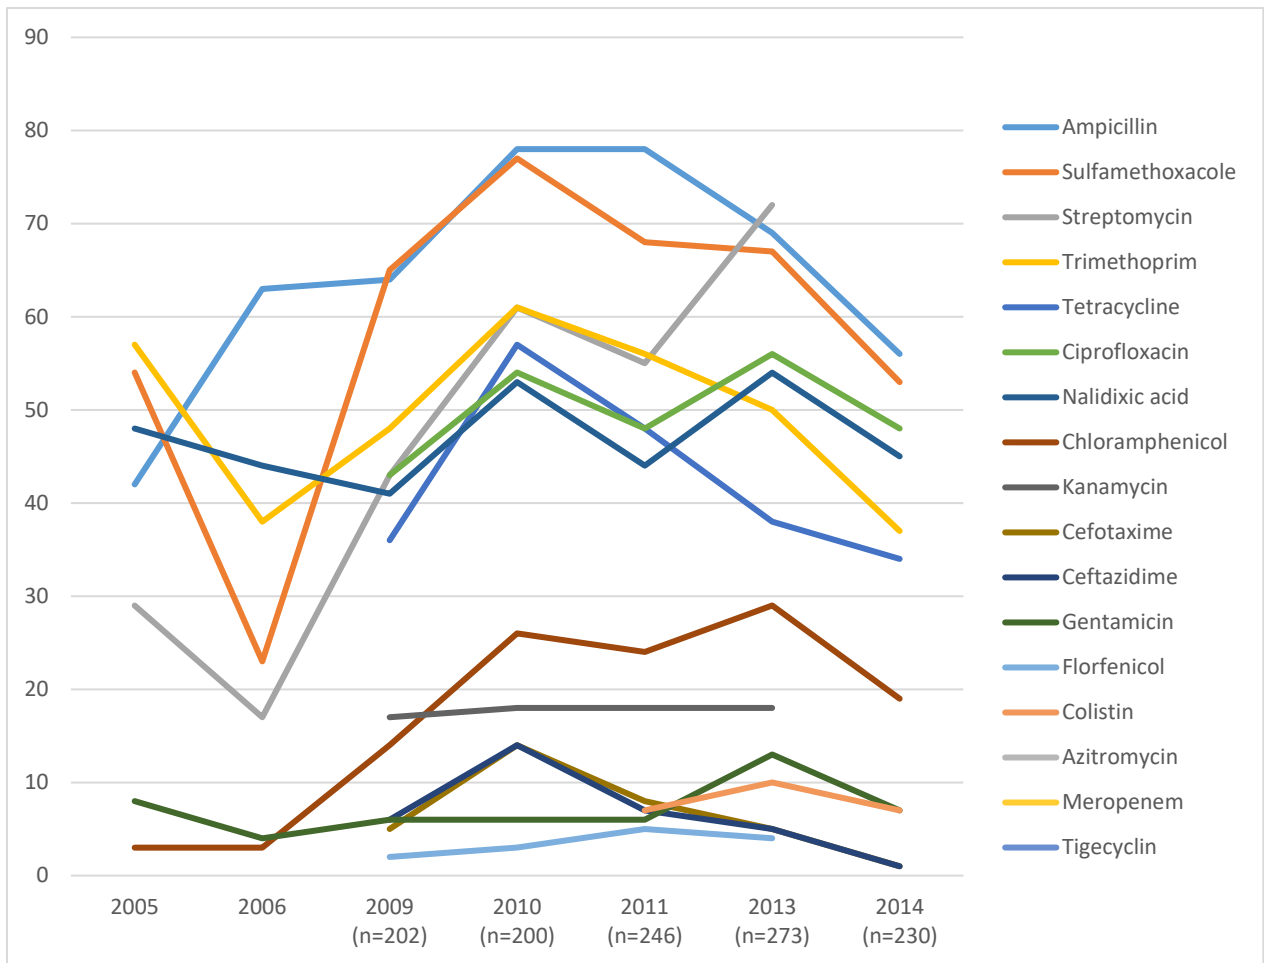

238

239

240 Figure 3. Percentages of antibiotic resistance in *E. coli* isolates from intestinal samples of  
 241 healthy broilers in the period from 2005 to 2014 in Germany, based on European Food Safety  
 242 Authority and European Centre for Disease Prevention and Control, 2011, 2016; German  
 243 Federal Office of Consumer Protection and Food Safety, 2012a, 2013, 2015a, 2016a;  
 244 Kaesbohrer, et al., 2012.

245

246

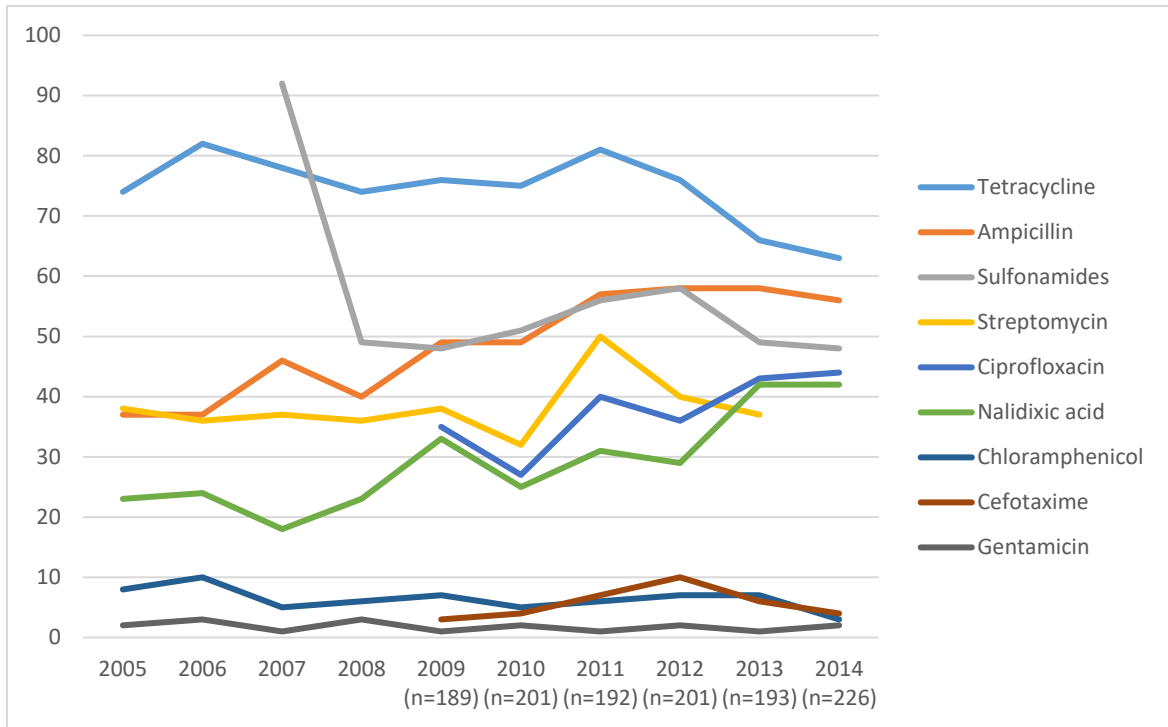

247

248 Figure 4. Percentages of antibiotic resistance in *E. coli* isolates from healthy broilers in the  
 249 period from 2005 to 2014 in France, based on European Food Safety Authority and European  
 250 Centre for Disease Prevention and Control 2011, 2012, 2013, 2014, 2015, 2016)

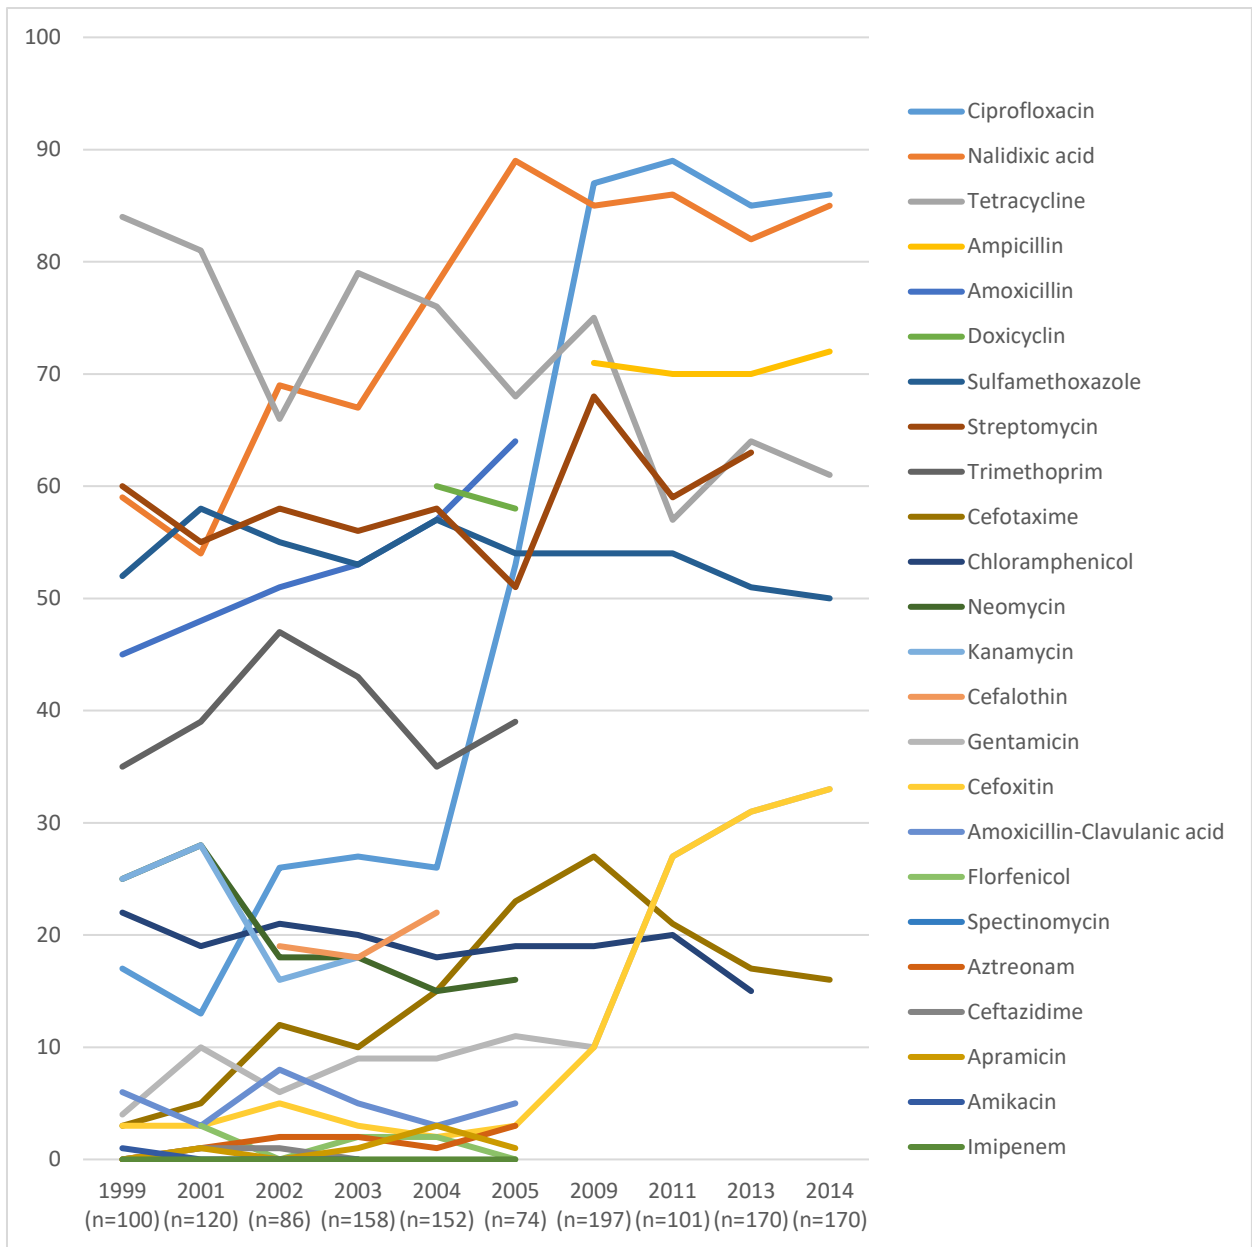

251

252 Figure 5. Percentages of antibiotic resistance in *E. coli* isolates from healthy broilers in the  
 253 period from 1999 to 2014 in Spain, based on European Food Safety Authority and European  
 254 Centre for Disease Prevention and Control, 2011, 2013, 2015, 2016; Ministry of Agriculture  
 255 Fisheries and Food in Spain 2005, 2006)

256

257

258
